# Supplementary material for: OprF Impacts Pseudomonas aeruginosa Biofilm Matrix eDNA Levels in a Nutrient-Dependent Manner
Source: PubMed Central journal article supplement (PMC10367591; doi:10.1128/jb.00080-23), 2023-06-13
Supplement: jb.00080-23-s0001.pdf [file jb.00080-23-s0001.pdf]

OprF impacts *Pseudomonas aeruginosa* biofilm matrix eDNA levels  
in a nutrient-dependent manner

Erin K. Cassin, Sophia A. Araujo-Hernandez, Dena S. Baughn,  
Melissa C. Londono, Daniela Q. Rodriguez, Natalie S. Al-Otaibi,  
Aude Picard, Julien R. C. Bergeron, and Boo Shan Tseng

**SUPPLEMENTAL MATERIAL**

Supplemental Methods  
Supplemental Tables S1 – S7  
Supplemental Figures S1 – S8  
Supplemental References

## SUPPLEMENTAL METHODS

### Media, antibiotics, and antibodies

Bacteria were grown in liquid TSB (17 g/L tryptone, 3 g/L soytone, 5 g/L NaCl, 2.5 g/L glucose, 2.5 g/L K<sub>2</sub>HPO<sub>4</sub>), TSB 10 g/L NaCl (17 g/L tryptone, 3 g/L soytone, 10 g/L NaCl, 2.5 g/L glucose, 2.5 g/L K<sub>2</sub>HPO<sub>4</sub>), TSB no glucose (17 g/L tryptone, 3 g/L soytone, 5 g/L NaCl, 2.5 g/L K<sub>2</sub>HPO<sub>4</sub>), TSB no K<sub>2</sub>HPO<sub>4</sub> (17 g/L tryptone, 3 g/L soytone, 5 g/L NaCl, 2.5 g/L glucose), LB (10 g/L tryptone, 5 g/L yeast extract, 10 g/L NaCl), LB 5 g/L NaCl (10 g/L tryptone, 5 g/L yeast extract, 5 g/L NaCl), LB w/ glucose (10 g/L tryptone, 5 g/L yeast extract, 10 g/L NaCl, 2.5 g/L glucose), and LB w/ K<sub>2</sub>HPO<sub>4</sub> (10 g/L tryptone, 5 g/L yeast extract, 10 g/L NaCl, 2.5 g/L K<sub>2</sub>HPO<sub>4</sub>). For experiments involving induction of the P<sub>BADara</sub> promoter, 0.5% L-arabinose (Sigma Aldrich) was added to the desired liquid medium. NSLB + 10% sucrose (10 g/L tryptone, 5 g/L yeast extract, 10% sucrose) was used during strain construction. Semisolid media contained 1.5% Bacto agar in LB or 1.0% Noble agar in VBMM (1). Antibiotics were used for strain construction only, at the following concentrations: for *E. coli*, 10 mg/L gentamicin, 50 mg/L kanamycin, 100 mg/L ampicillin; for *P. aeruginosa*, 60 mg/L gentamicin. Antibodies against OprF (CusaBio, CSB-PA318417LA01EZ) were used at 1/1000; and ecotin (2) at 1/400.

### Construction of strains

*P. aeruginosa* strain sequences were acquired from the Pseudomonas Genome Database ([www.pseudomonas.com](http://www.pseudomonas.com))(3). Bacterial genomic DNA was obtained using the DNeasy Blood & Tissue Kit (Qiagen), and PCR fragments were purified using the Wizard SV Gel and PCR Clean-up System (Promega). Allelic exchange was used for gene deletions with the corresponding plasmid containing the deletion allele, as previously described (4). For the strain containing a miniTn7 construct, the allele was chromosomally integrated, as previously described (5, 6).

Construction of deletion alleles was performed using the regions flanking the gene of interest, produced by PCR of PAO1 gDNA using the respective UpF/UpR and DownF/DownR primer pairs. These fragments were then connected by SOE PCR and inserted into pDONRPEX18Gm using GateWay cloning (Invitrogen) to produce deletion vectors, which were confirmed via Sanger sequencing.

A miniTn7-based plasmid with *oprF* under the control of an arabinose-inducible promoter was made by first inserting *oprF* into a GateWay compatible vector using the PCR product of OEC01/03 with PAO1 gDNA. An LR reaction with this vector, pJJH187, and pUC18-miniTn7T2-Gm-GW was performed, resulting in a pDEST construct (pEC17).

### Analysis of whole genome sequencing

Genomes of *P. aeruginosa* were sequenced using an Illumina NextSeq platform and sequencing reads were aligned to the appropriate PAO1 reference genome (3) at the Microbial Genome Sequencing Center (Pittsburgh, PA).

### **Growth rate assays**

Cells from stationary phase cultures were seeded into flat-bottom polystyrene 96-well plates at an OD<sub>600</sub> of 0.001. Absorbance at OD<sub>600</sub> was read in a Synergy Hybrid HTX Microplate Reader (Bio-Tek Instruments) every 5 min for 16 h at 37°C with shaking. The average of three biological replicates, which is the average of 4 technical replicates per strain, was reported. Growth rates were calculated by determining the slope of the growth curve in exponential phase.

### **Transmission electron microscopy of *P. aeruginosa***

Cell pellets were harvested by centrifugation at 8000 g at 4°C for 15 min. Cells were incubated overnight at 4°C in a premixed fixative solution of formaldehyde-glutaraldehyde (2.5% each) in 0.1 M sodium cacodylate buffer at pH 7.4 (Electron Microscopy Sciences). Cells were subsequently washed with a solution containing 1.2% sucrose and 4 mM CaCl<sub>2</sub> in 0.1 M sodium cacodylate buffer, then subjected to a secondary fixation for 1 h at room temperature with 2% OsO<sub>4</sub> (prepared in the above solution). After another wash, cells were stained for 1 h at room temperature with UranylLess, a solution containing lanthanides, and an alternative to uranyl acetate (Electron Microscopy Sciences). Cells were serially dehydrated with the following ethanol solutions (10 min each): 50%, 70%, 95% (two times), 100% (three times). Cells were gradually infiltrated with epoxy-type resin (EMbed 812 kit with BDMA, Electron Microscopy Sciences) through the following steps: ethanol was exchanged with 100% acetone (three times 10 min), then cells were exposed to a 1:1 acetone-resin mix for 1 hr at room temperature, to a 1:3 acetone-resin mix overnight, and to 100% resin (three times for 1hr). After a final exchange with fresh resin, samples were cured for 48 hr at 60°C. Ultrathin sections (70 nm) were cut using a Leica EM UC7 ultramicrotome, recovered on 200-mesh Cu grids, and double-stained with uranyl acetate and lead citrate for 10 and 4 min, respectively. Transmission electron microscopy was performed at 120 KeV on a JEOL TEM 1400Plus at the Electron Microscopy Core Laboratory of the University of Utah. Images were acquired with a Gatan Orius TM SC-1000 CCD camera (1 sec acquisition time).

For negative stain grid preparation and imaging, 5 µl of WT or  $\Delta oprF$  culture grown in TSB or LB and grown to static or exponential phase was applied onto glow-discharged, carbon-coated copper grids (Agar Scientific). After incubating the sample for 2 min at room temperature, grids were rapidly washed in one drop of DI water and subsequently exposed to two successive short drops and one long incubation (30 sec) drop of UranylLess stain solution (Electron Microscopy Sciences). Images were recorded on a JEM1400 TEM (JEOL) equipped with a Matataki flash (JEOL) at 5000x and 12000x magnifications for all conditions.

### **Medium osmolarity**

Medium osmolarity for 8 base media and variants (TSB, TSB 10g/L NaCl, TSB no glucose, TSB no K<sub>2</sub>HPO<sub>4</sub>, LB, LB 5 g/L NaCl, LB w/ glucose, LB w/ K<sub>2</sub>HPO<sub>4</sub>) was measured using a Vapro 5520 vapor pressure osmometer (Wescor). 10 µL of each medium was loaded onto sample discs (Wescor SS-033) and subjected to a 73 sec vaporization. The average of 3 readings per medium was reported.

**Medium metal concentrations by ICP-MS**

Each medium (TSB, TSB 10g/L NaCl, TSB no glucose, TSB no K<sub>2</sub>HPO<sub>4</sub>, LB, LB 5 g/L NaCl, LB w/ glucose, LB w/ K<sub>2</sub>HPO<sub>4</sub>) was filtered through a 0.22 µm nylon syringe filter (Rephile RephiQuik). Samples were diluted 1:100 in 2% nitric acid and injected into a ThermoFisher iCAP RQ inductively coupled plasma mass spectrometer.

**Planktonic cell staining with crystal violet**

Overnight culture was diluted 1:100 in fresh TSB and grown to mid-log growth phase (0.5 OD<sub>600</sub>). 10-fold serial dilutions of mid-log cultures were spread on LB agar and incubated overnight for verification of cell counts (CFU/mL). Mid-log culture volumes corresponding to 5.0x10<sup>7</sup>, 7.5x10<sup>7</sup>, 1x10<sup>8</sup>, 1.25x10<sup>8</sup>, 1.5x10<sup>8</sup>, 2.0x10<sup>8</sup> CFU/mL were centrifuged at 6000g for 8 min. Supernatant was removed by pipetting, and cell pellets were stained with 0.1% crystal violet, vortexed, and incubated for 15 min. Stained cells were centrifuged at 6000g for 8 min and were subsequently washed with 1mL deionized water three times (with centrifugation between washes). Stained biomass was eluted using 30% acetic acid, transferred to a flat-bottom 96-well plate (Greiner Bio-One, #655090), and the absorbance at OD<sub>550</sub> was read in a Synergy Hybrid HTX Microplate Reader (BioTek Instruments). Absorbance from stained blank media tubes was subtracted from raw OD<sub>550</sub> readings. Three biological replicates were averaged.

## SUPPLEMENTAL TABLES

**Supplemental Table S1. Media components of tryptic soy broth (TSB) and lysogeny broth (LB).**

| <b>TSB</b> |                                 | <b>LB</b> |               |
|------------|---------------------------------|-----------|---------------|
| 17 g/L     | Tryptone                        | 10 g/L    | Tryptone      |
| 3 g/L      | Soytone                         | 5 g/L     | Yeast extract |
| 5 g/L      | NaCl                            | 10 g/L    | NaCl          |
| 2.5 g/L    | Glucose                         |           |               |
| 2.5 g/L    | K <sub>2</sub> HPO <sub>4</sub> |           |               |

**Supplemental Table S2. Statistical differences in static biofilm biomass grown in TSB versus LB.**

| Strain                     | Media | WT  |    | $\Delta$ pslD |    | $\Delta$ oprF |    | $\Delta$ oprF + oprF |    | $\Delta$ oprF + oprF + ara |    |
|----------------------------|-------|-----|----|---------------|----|---------------|----|----------------------|----|----------------------------|----|
|                            |       | TSB | LB | TSB           | LB | TSB           | LB | TSB                  | LB | TSB                        | LB |
| WT                         | TSB   |     |    | *             |    | *             |    | *                    |    |                            |    |
|                            | LB    |     |    |               | *  |               |    |                      |    |                            |    |
| $\Delta$ pslD              | TSB   |     |    |               |    |               |    | *                    |    | *                          |    |
|                            | LB    |     |    |               |    |               | *  |                      | *  |                            | *  |
| $\Delta$ oprF              | TSB   |     |    |               |    |               | *  |                      |    |                            |    |
|                            | LB    |     |    |               |    |               |    |                      |    |                            |    |
| $\Delta$ oprF + oprF       | TSB   |     |    |               |    |               |    |                      |    |                            |    |
|                            | LB    |     |    |               |    |               |    |                      |    |                            |    |
| $\Delta$ oprF + oprF + ara | TSB   |     |    |               |    |               |    |                      |    |                            |    |
|                            | LB    |     |    |               |    |               |    |                      |    |                            |    |

Significance was determined via a two-way ANOVA with post-hoc Bonferroni. Asterisk,  $p < 0.05$ . Open box, no statistical difference.

**Supplemental Table S3. Statistical differences in static biofilm biomass grown in TSB and LB variants.**

| TSB NaCl                   |      | WT |    | $\Delta$ pslD |    | $\Delta$ oprF |    | $\Delta$ oprF + oprF |    | $\Delta$ oprF + oprF + ara |    |
|----------------------------|------|----|----|---------------|----|---------------|----|----------------------|----|----------------------------|----|
| Strain                     | NaCl | 5  | 10 | 5             | 10 | 5             | 10 | 5                    | 10 | 5                          | 10 |
| WT                         | 5    |    |    | *             |    | *             |    | *                    |    |                            |    |
|                            | 10   |    |    |               | *  |               |    |                      |    |                            | *  |
| $\Delta$ pslD              | 5    |    |    |               |    |               |    | *                    |    | *                          |    |
|                            | 10   |    |    |               |    |               | *  |                      | *  |                            | *  |
| $\Delta$ oprF              | 5    |    |    |               |    |               | *  |                      |    |                            |    |
|                            | 10   |    |    |               |    |               |    |                      |    |                            |    |
| $\Delta$ oprF + oprF       | 5    |    |    |               |    |               |    |                      | *  |                            |    |
|                            | 10   |    |    |               |    |               |    |                      |    |                            | *  |
| $\Delta$ oprF + oprF + ara | 5    |    |    |               |    |               |    |                      |    |                            |    |
|                            | 10   |    |    |               |    |               |    |                      |    |                            |    |

| LB NaCl                    |      | WT |    | $\Delta$ pslD |    | $\Delta$ oprF |    | $\Delta$ oprF + oprF |    | $\Delta$ oprF + oprF + ara |    |
|----------------------------|------|----|----|---------------|----|---------------|----|----------------------|----|----------------------------|----|
| Strain                     | NaCl | 5  | 10 | 5             | 10 | 5             | 10 | 5                    | 10 | 5                          | 10 |
| WT                         | 5    |    |    | *             |    | *             |    | *                    |    |                            |    |
|                            | 10   |    |    |               | *  |               |    |                      |    |                            |    |
| $\Delta$ pslD              | 5    |    |    |               |    | *             |    | *                    |    | *                          |    |
|                            | 10   |    |    |               |    |               | *  |                      | *  |                            | *  |
| $\Delta$ oprF              | 5    |    |    |               |    |               | *  |                      |    | *                          |    |
|                            | 10   |    |    |               |    |               |    |                      |    |                            |    |
| $\Delta$ oprF + oprF       | 5    |    |    |               |    |               |    |                      | *  | *                          |    |
|                            | 10   |    |    |               |    |               |    |                      |    |                            |    |
| $\Delta$ oprF + oprF + ara | 5    |    |    |               |    |               |    |                      |    |                            |    |
|                            | 10   |    |    |               |    |               |    |                      |    |                            |    |

| TSB glucose                |         | WT  |   | $\Delta$ pslD |   | $\Delta$ oprF |   | $\Delta$ oprF + oprF |   | $\Delta$ oprF + oprF + ara |   |
|----------------------------|---------|-----|---|---------------|---|---------------|---|----------------------|---|----------------------------|---|
| Strain                     | Glucose | 2.5 | 0 | 2.5           | 0 | 2.5           | 0 | 2.5                  | 0 | 2.5                        | 0 |
| WT                         | 2.5     |     |   | *             |   | *             |   | *                    |   |                            |   |
|                            | 0       |     |   |               | * |               |   |                      |   |                            | * |
| $\Delta$ pslD              | 2.5     |     |   |               |   |               |   | *                    |   | *                          |   |
|                            | 0       |     |   |               |   |               | * |                      | * |                            | * |
| $\Delta$ oprF              | 2.5     |     |   |               |   |               | * |                      |   |                            |   |
|                            | 0       |     |   |               |   |               |   |                      |   |                            |   |
| $\Delta$ oprF + oprF       | 2.5     |     |   |               |   |               |   |                      | * |                            |   |
|                            | 0       |     |   |               |   |               |   |                      |   |                            |   |
| $\Delta$ oprF + oprF + ara | 2.5     |     |   |               |   |               |   |                      |   |                            |   |
|                            | 0       |     |   |               |   |               |   |                      |   |                            |   |

| LB glucose                 |         | WT |     | $\Delta$ pslD |     | $\Delta$ oprF |     | $\Delta$ oprF + oprF |     | $\Delta$ oprF + oprF + ara |     |
|----------------------------|---------|----|-----|---------------|-----|---------------|-----|----------------------|-----|----------------------------|-----|
| Strain                     | Glucose | 0  | 2.5 | 0             | 2.5 | 0             | 2.5 | 0                    | 2.5 | 0                          | 2.5 |
| WT                         | 0       |    |     | *             |     |               |     |                      |     |                            |     |
|                            | 2.5     |    |     |               | *   |               | *   |                      | *   |                            |     |
| $\Delta$ pslD              | 0       |    |     |               |     | *             |     | *                    |     | *                          |     |
|                            | 2.5     |    |     |               |     |               | *   |                      | *   |                            | *   |
| $\Delta$ oprF              | 0       |    |     |               |     |               | *   |                      |     |                            |     |
|                            | 2.5     |    |     |               |     |               |     |                      |     |                            |     |
| $\Delta$ oprF + oprF       | 0       |    |     |               |     |               |     |                      |     |                            |     |
|                            | 2.5     |    |     |               |     |               |     |                      |     |                            | *   |
| $\Delta$ oprF + oprF + ara | 0       |    |     |               |     |               |     |                      |     |                            |     |
|                            | 2.5     |    |     |               |     |               |     |                      |     |                            |     |

| TSB $K_2HPO_4$             |            | WT  |   | $\Delta$ pslD |   | $\Delta$ oprF |   | $\Delta$ oprF + oprF |   | $\Delta$ oprF + oprF + ara |   |
|----------------------------|------------|-----|---|---------------|---|---------------|---|----------------------|---|----------------------------|---|
| Strain                     | $K_2HPO_4$ | 2.5 | 0 | 2.5           | 0 | 2.5           | 0 | 2.5                  | 0 | 2.5                        | 0 |
| WT                         | 2.5        |     |   | *             |   | *             |   | *                    |   |                            |   |
|                            | 0          |     |   |               | * |               | * |                      | * |                            | * |
| $\Delta$ pslD              | 2.5        |     |   |               |   |               |   | *                    |   | *                          |   |
|                            | 0          |     |   |               |   |               | * |                      | * |                            | * |
| $\Delta$ oprF              | 2.5        |     |   |               |   |               |   |                      |   |                            |   |
|                            | 0          |     |   |               |   |               |   |                      |   |                            | * |
| $\Delta$ oprF + oprF       | 2.5        |     |   |               |   |               |   |                      | * |                            |   |
|                            | 0          |     |   |               |   |               |   |                      |   |                            | * |
| $\Delta$ oprF + oprF + ara | 2.5        |     |   |               |   |               |   |                      |   |                            | * |
|                            | 0          |     |   |               |   |               |   |                      |   |                            |   |

| LB $K_2HPO_4$              |            | WT |     | $\Delta$ pslD |     | $\Delta$ oprF |     | $\Delta$ oprF + oprF |     | $\Delta$ oprF + oprF + ara |     |
|----------------------------|------------|----|-----|---------------|-----|---------------|-----|----------------------|-----|----------------------------|-----|
| Strain                     | $K_2HPO_4$ | 0  | 2.5 | 0             | 2.5 | 0             | 2.5 | 0                    | 2.5 | 0                          | 2.5 |
| WT                         | 0          |    |     | *             |     |               |     |                      |     |                            |     |
|                            | 2.5        |    |     |               | *   |               |     |                      |     |                            |     |
| $\Delta$ pslD              | 0          |    |     |               |     | *             |     | *                    |     | *                          |     |
|                            | 2.5        |    |     |               |     |               | *   |                      | *   |                            | *   |
| $\Delta$ oprF              | 0          |    |     |               |     |               |     |                      |     |                            |     |
|                            | 2.5        |    |     |               |     |               |     |                      |     |                            |     |
| $\Delta$ oprF + oprF       | 0          |    |     |               |     |               |     |                      |     |                            |     |
|                            | 2.5        |    |     |               |     |               |     |                      |     |                            |     |
| $\Delta$ oprF + oprF + ara | 0          |    |     |               |     |               |     |                      |     |                            |     |
|                            | 2.5        |    |     |               |     |               |     |                      |     |                            |     |

Significance was determined via a two-way ANOVA with post-hoc Bonferroni. Asterisk,  $p < 0.05$ . Open box, no statistical difference.



**Supplemental Table S4. Bacterial strains used in this study.**

| Strains                              | Relevant characteristics                                                                                                                      | Source     |
|--------------------------------------|-----------------------------------------------------------------------------------------------------------------------------------------------|------------|
| <b><i>Escherichia coli</i></b>       |                                                                                                                                               |            |
| NEB5α                                | For cloning; fhuA2 Δ(argF-lacZ)U169 phoA glnV44 Φ80Δ (lacZ)M15 gyrA96 recA1 relA1 endA1 thi-1 hsdR17                                          | NEB        |
| ccdB<br>Survival2<br>T1R             | F <sup>-</sup> mcrA Δ(mrr-hsdRMS-mcrBC) Φ80lacZΔM15 ΔlacX74 recA1 araΔ139 Δ(ara-leu)7697 galU galK rpsL endA1 nupG fhuA::IS2, Sm <sup>r</sup> | Invitrogen |
| S17.1 (λ <sub>pir</sub> )            | For conjugation; F <sup>-</sup> RP4-2-Tc::Mu <i>aphA</i> ::Tn7 <i>recA</i> λ <sub>pir</sub> lysogen, Sm <sup>r</sup> , Tc <sup>r</sup>        | (7)        |
| <b><i>Pseudomonas aeruginosa</i></b> |                                                                                                                                               |            |
| PAO1                                 | Wild-type PAO1                                                                                                                                | (8)        |
| E2                                   | Tomato plant isolate                                                                                                                          | (9)        |
| BTPa1020                             | E2 containing an in-frame deletion of <i>oprF</i>                                                                                             | This study |
| MSH10                                | Water isolate                                                                                                                                 | (9)        |
| BTPa1021                             | MSH10 containing an in-frame deletion of <i>oprF</i>                                                                                          | This study |
| X24509                               | UTI isolate                                                                                                                                   | (9)        |
| BTPa1022                             | X24509 containing an in-frame deletion of <i>oprF</i>                                                                                         | This study |
| H103                                 | PAO1 derivative; Cm <sup>r</sup> auxotroph                                                                                                    | (10)       |
| H636                                 | H103 <i>oprF</i> ::Ω                                                                                                                          | (11)       |
| PAO1 Δ <i>pslD</i>                   | PAO1 containing an in-frame deletion of <i>pslD</i>                                                                                           | (12)       |
| BTPa768                              | PAO1 containing an in-frame deletion of <i>oprF</i>                                                                                           | This study |
| BTPa907                              | PAO1 Δ <i>oprF attTn7</i> ::P <sub>BADara</sub> - <i>oprF</i>                                                                                 | This study |
| BTPa917                              | PAO1 containing an in-frame deletion of <i>pqsA</i>                                                                                           | This study |
| BTPa919                              | PAO1 containing an in-frame deletion of <i>pqsH</i>                                                                                           | This study |
| BTPa933                              | PAO1 containing in-frame deletions of <i>oprF</i> and <i>pqsA</i>                                                                             | This study |
| BTPa935                              | PAO1 containing in-frame deletions of <i>oprF</i> and <i>pqsH</i>                                                                             | This study |

**Supplemental Table S5. Plasmids used in this study.**

| <b>Plasmids</b>          | <b>Relevant characteristics</b>                                                                                                                                                    | <b>Source</b> |
|--------------------------|------------------------------------------------------------------------------------------------------------------------------------------------------------------------------------|---------------|
| pDONR221 P5-P2           | Gateway-compatible vector with attP5 and attP2 recombination sites and <i>ccdB</i> ; Kn <sup>r</sup> , Cm <sup>r</sup>                                                             | Invitrogen    |
| pDONRPEX18Gm             | pEX18-based, Gateway-compatible suicide vector (Accession No. KM880128) with <i>attP1</i> and <i>attP2</i> recombination sites and <i>ccdB</i> ; Gm <sup>r</sup> , Cm <sup>r</sup> | (4)           |
| pUC18-miniTn7T2-Gm-GW    | Gateway-compatible miniTn7 vector with <i>attR1</i> and <i>attR2</i> recombination sites and <i>ccdB</i> ; Ap <sup>r</sup> , Gm <sup>r</sup> , Cm <sup>r</sup>                     | (12)          |
| pDONRPUC18T-miniTn7T2-Gm | Gateway-compatible miniTn7 vector with <i>attP1</i> and <i>attP2</i> recombination sites and <i>ccdB</i> ; Ap <sup>r</sup> , Gm <sup>r</sup> , Cm <sup>r</sup>                     | (2)           |
| pUCP22T2-GW              | Gateway-compatible pUCP22 vector with <i>attR1</i> and <i>attR2</i> recombination sites and <i>ccdB</i> ; Ap <sup>r</sup> , Gm <sup>r</sup> , Cm <sup>r</sup>                      | (13)          |
| pTNS2                    | T7 transposase expression vector; Ap <sup>r</sup>                                                                                                                                  | (5)           |
| pFLP2                    | Plasmid that expresses Flp recombinase; Ap <sup>r</sup>                                                                                                                            | (5)           |
| pJJH187                  | pDONR221P1P5r-based Gateway-compatible vector encoding the <i>araC</i> repressor protein and the P <sub><i>araBAD</i></sub> promoter; Kn <sup>r</sup>                              | (14)          |
| pEC17                    | pUC18-miniTn7:: <i>P<sub>BADara</sub>-oprF</i>                                                                                                                                     | This study    |
| pSA01                    | pENTR-pEX18- $\Delta$ <i>oprF</i>                                                                                                                                                  | This study    |
| pDR10                    | pENTR-pEX18- $\Delta$ <i>pqsA</i>                                                                                                                                                  | This study    |
| pDR11                    | pENTR-pEX18- $\Delta$ <i>pqsH</i>                                                                                                                                                  | This study    |

**Supplemental Table S6. Oligonucleotides used in this study.**

| Primer                                | Sequence                                                    |
|---------------------------------------|-------------------------------------------------------------|
| OEC01 ( <i>oprF</i> DownR)            | ggggaccactttgtacaagaaagctgggtaTACTTGGCTTCAGCTTCTACTTCG      |
| OEC03 ( <i>oprF</i> promoterless UpF) | ggggacaactttgtatacaaaaagttgCGAGATGGGGATTTAACGGATGA AACTGAAG |
| OSA1 ( <i>oprF</i> UpF)               | CTCGAGGCTGGCGTAGGTG                                         |
| OSA2 ( <i>oprF</i> UpR)               | ggggacaagtttgtacaaaaaagcaggctcaGATTGGATCGTTGGCTCGTCCATG     |
| OSA3 ( <i>oprF</i> DownF)             | TAAGGTGTTCTTCAGTTTCATCCGTTAAATC                             |
| OSA4 ( <i>oprF</i> DownR)             | gatttaacggatgaaactgaagaacaccttaGAAGTAGAAGCTGAAGCC AAGTAATC  |
| OSA5 ( <i>oprF</i> SeqF)              | ggggaccactttgtacaagaaagctgggtaGCTGCTGGCTGGAGGCATG           |
| OSA6 ( <i>oprF</i> SeqR)              | GAGGAGGCTTCCGAGGAGAAG                                       |
| OBT850 ( <i>pqsA</i> UpF)             | ggggacaagtttgtacaaaaaagcaggctcaATTTCAACAGGGAAGCCTGCAAATG    |
| OBT851 ( <i>pqsA</i> UpR)             | GTTGGCCAATGTGGACATGACAGAAC                                  |
| OBT852 ( <i>pqsA</i> DownF)           | gttctgtcatgtccacattggccaacGAGGAACGGGCATGTTGATTCAG           |
| OBT853 ( <i>pqsA</i> DownR)           | ggggaccactttgtacaagaaagctgggtaCCATTCCTGCGCCGGATCA C         |
| OBT854 ( <i>pqsA</i> SeqF)            | TATGGGGCATGTAGGTGTCCTCTTC                                   |
| OBT855 ( <i>pqsA</i> SeqR)            | CCTACCTGGCGAATATCGGTATTC                                    |
| OBT856 ( <i>pqsH</i> UpF)             | ggggacaagtttgtacaaaaaagcaggctcaGGAGCGGGGTCTGCGTATAG         |
| OBT857 ( <i>pqsH</i> UpR)             | AACGGTCATCCGTTGCTCCTTAG                                     |
| OBT858 ( <i>pqsH</i> DownF)           | ctaaggagcaacggatgaccgttGGTGAGATGGCCGCACAGTAG                |
| OBT859 ( <i>pqsH</i> DownR)           | ggggaccactttgtacaagaaagctgggtaCATCTTCACGTCCATCAGGACGAC      |
| OBT860 ( <i>pqsH</i> SeqF)            | GCTTCCGGCAATCACTACCTTG                                      |
| OBT861 ( <i>pqsH</i> SeqR)            | GGTGACTACCACGACCTTGATGTC                                    |

**Supplemental Table S7. Non-normalized static biofilm data from this study.**

Provided separately as an Excel file.

## SUPPLEMENTAL FIGURES

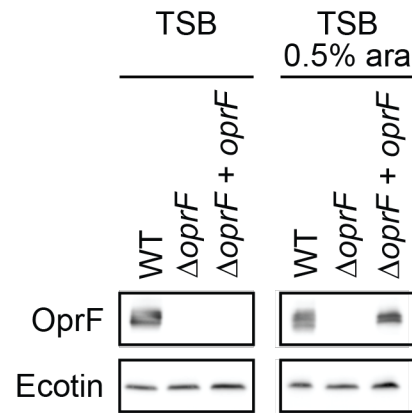

### Supplemental Figure S1. OprF is expressed upon induction in the $\Delta oprF + oprF$ restoration strain.

OprF levels in planktonic PAO1 (WT),  $\Delta oprF$ , and  $\Delta oprF attTn7::P_{BAD}-oprF$  ( $\Delta oprF + oprF$  restoration strain) grown without (left) and with (right) 0.5% L-arabinose inducer (ara) were determined by Western blot. Ecotin was used as a loading control.

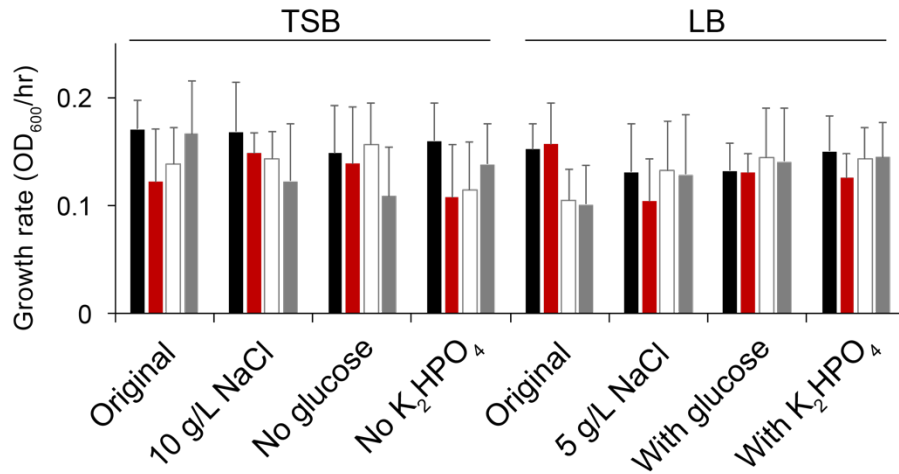

**Supplemental Figure S2. No planktonic growth defects between strains in various media.** Growth rate of PAO1 (WT, black),  $\Delta oprF$  (red), and the  $\Delta oprF attTn7::P_{BAD-oprF}$  restoration strain ( $\Delta oprF + oprF$ ) without (white) and with (gray) 0.5% arabinose in the indicated media. Error bars, SEM (N = 3). No significant difference between strains within a medium or between media within a strain ( $p > 0.05$ ; two-way ANOVA).

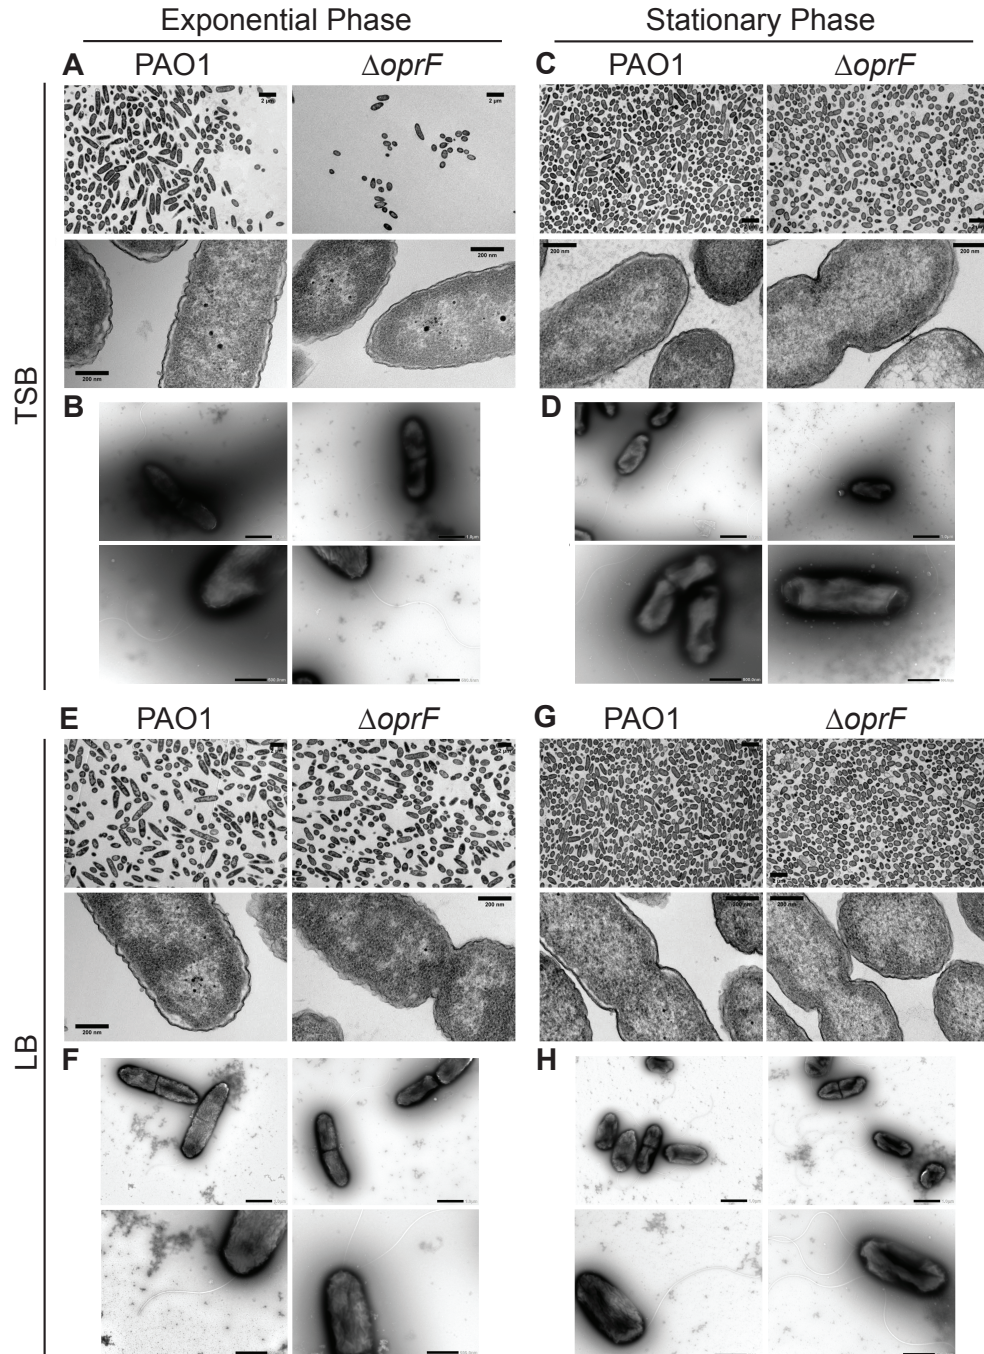

**Supplemental Figure S3. No major cell morphology differences between wild type and  $\Delta oprF$  grown in TSB or LB.**

(A, C, E, G) Transmission electron micrographs (TEM) of PAO1 wild-type (left) and  $\Delta oprF$  (right) cells grown in TSB (top row) and LB (bottom row) to exponential phase (0.6 OD<sub>600</sub>; left column) and stationary phase (16 hr; right column). Note: the lower cell density of  $\Delta oprF$  grown to exponential phase in TSB not representative of the whole pellet, which was homogeneous with other growth conditions). Bar, 2  $\mu$ m (top) and 200 nm (bottom). (B, D, F, H) Negative-stained electron micrographs of samples as described above. Bar, 1  $\mu$ m (top) and 500 nm (bottom).

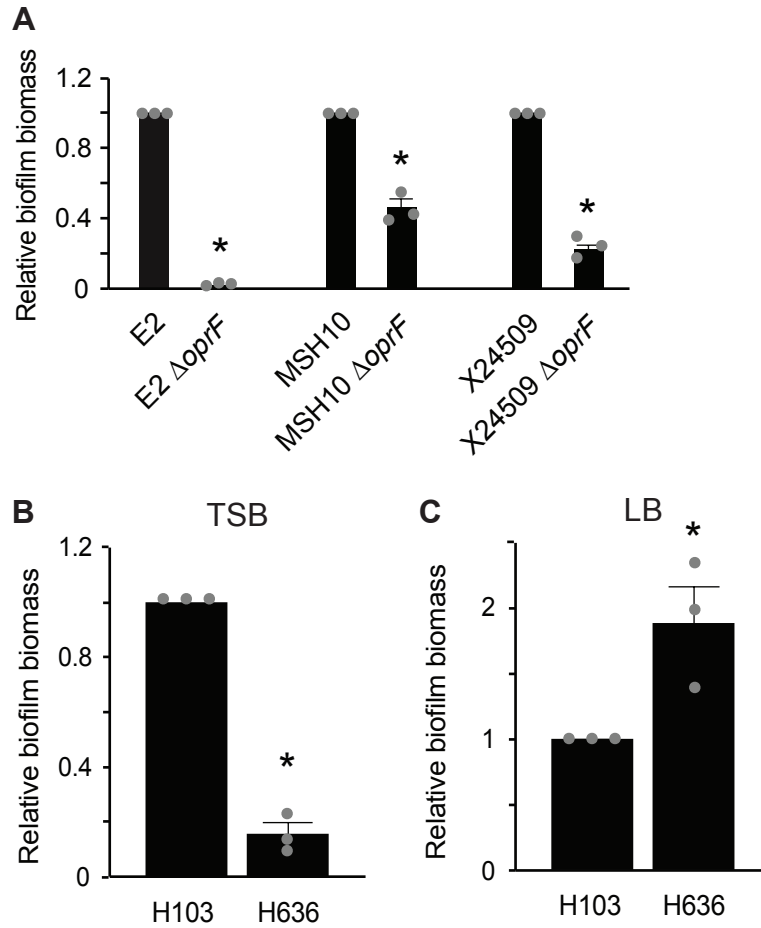

**Supplemental Figure S4. Clinical and environmental  $\Delta oprF$  strains form less biofilm in TSB.**

(A) 24-hour static microtiter biofilm assays were performed with a tomato plant isolate (E2), a water isolate (MSH10), a UTI isolate (X24509), and their respective isogenic  $\Delta oprF$  mutants in TSB. (B and C) 24-hour static microtiter biofilm assays were performed with an  $oprF$  interruption mutant (H636) and its parental strain (H103) in TSB and LB media. Biofilm formation was normalized to that of each respective parental strain grown in the same medium. Error bars, SEM (N = 3); dot, each biological replicate, which is the average of 3-6 technical replicates; asterisk, statistically different from the respective parental strain ( $p < 0.01$ ; Student t-test).

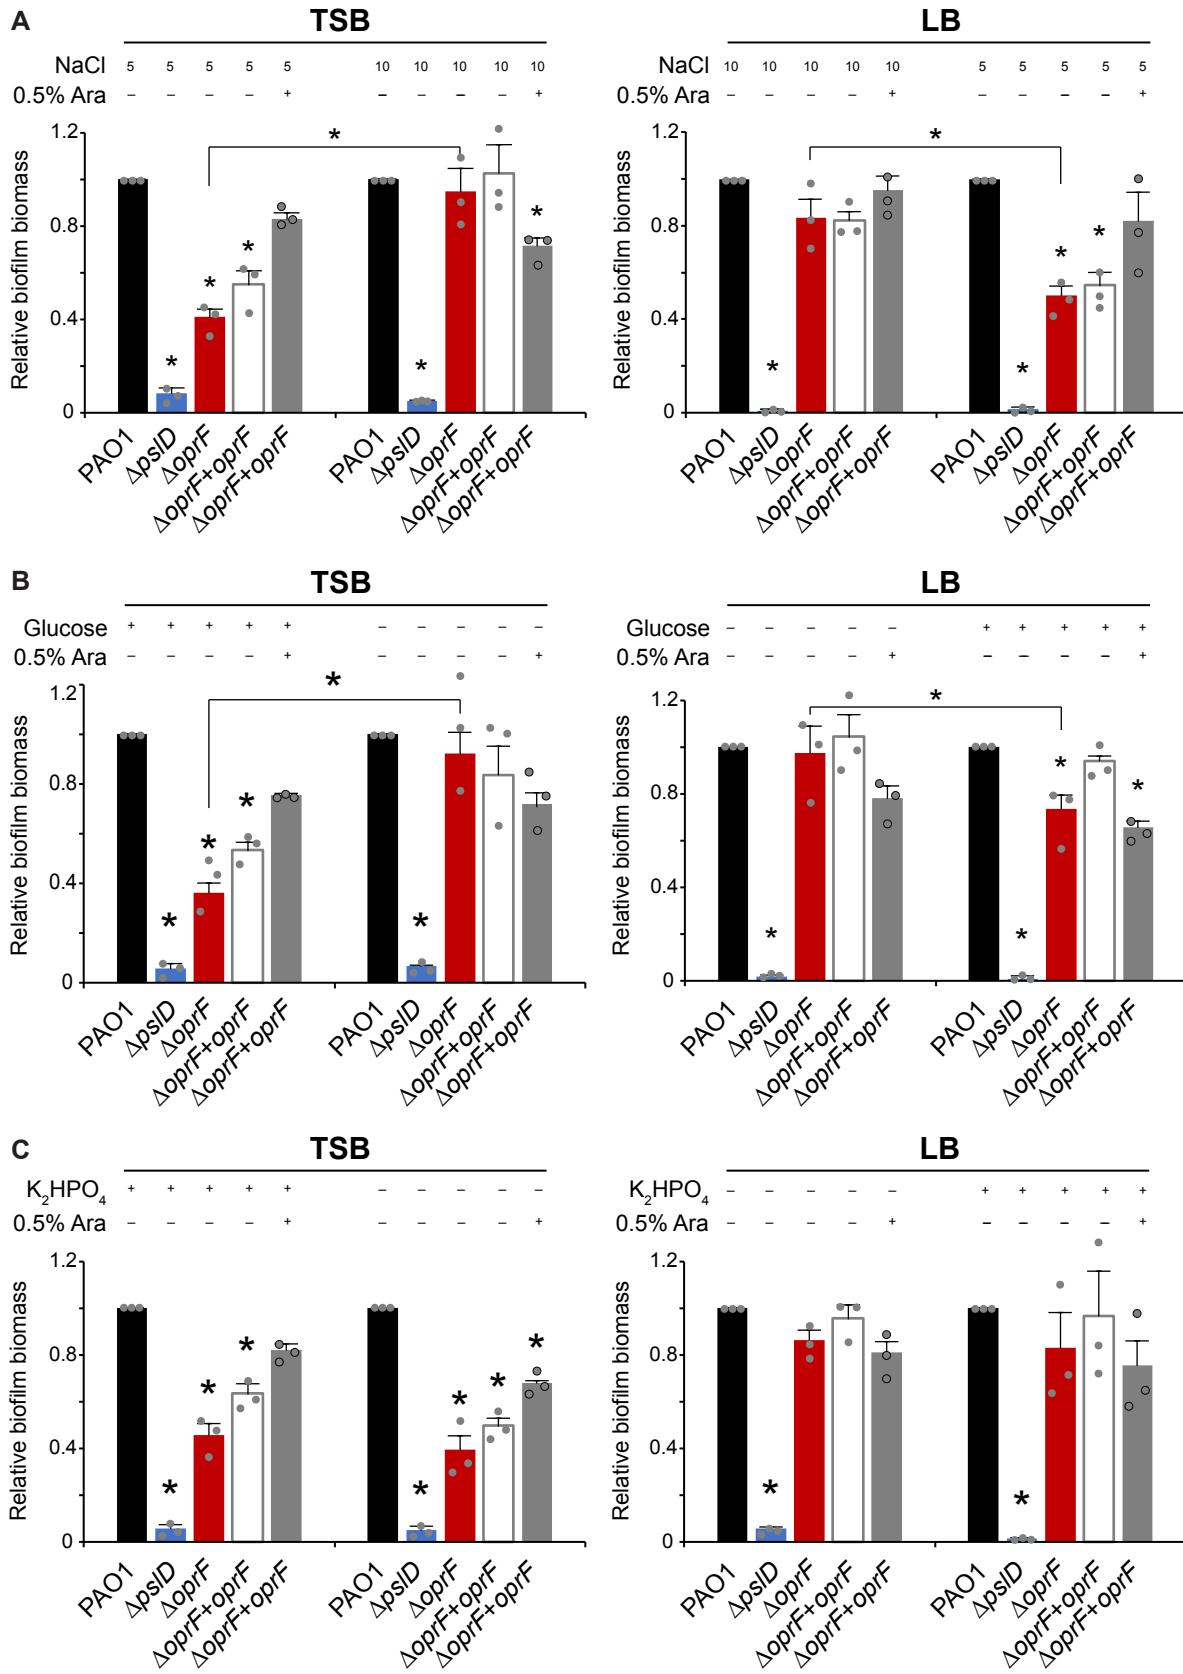



**Supplemental Figure S5.  $\Delta oprF$  forms less biofilm in low sodium chloride and with glucose.**

24-hour static microtiter biofilm assays were performed with *P. aeruginosa* PAO1 (WT, black),  $\Delta pslD$  (blue),  $\Delta oprF$  (red), and a  $\Delta oprF$  *attTn7::P<sub>BAD</sub>-oprF* restoration strain ( $\Delta oprF + oprF$ ) without (white) and with (gray) 0.5% arabinose (Ara) in the indicated media. Left column, TSB base medium and variants; right column, LB base medium and variants. (A) Biofilm formation in altered sodium chloride (NaCl); (B), glucose; and (C), dipotassium phosphate (K<sub>2</sub>HPO<sub>4</sub>) concentrations. Concentrations of altered medium component denoted in top row of each graph in g/L. Biofilm formation is normalized to WT in each respective medium. Error bars, SEM (N = 3); dot, each biological replicate, which is the average of 6 technical replicates; asterisk over bar, statistically different from WT in the same medium ( $p < 0.05$ ; two-way ANOVA with post hoc Bonferroni). Statistical difference between  $\Delta oprF$  strains in different media are indicated by a bar and asterisk. See Table S3 for full statistical comparisons.

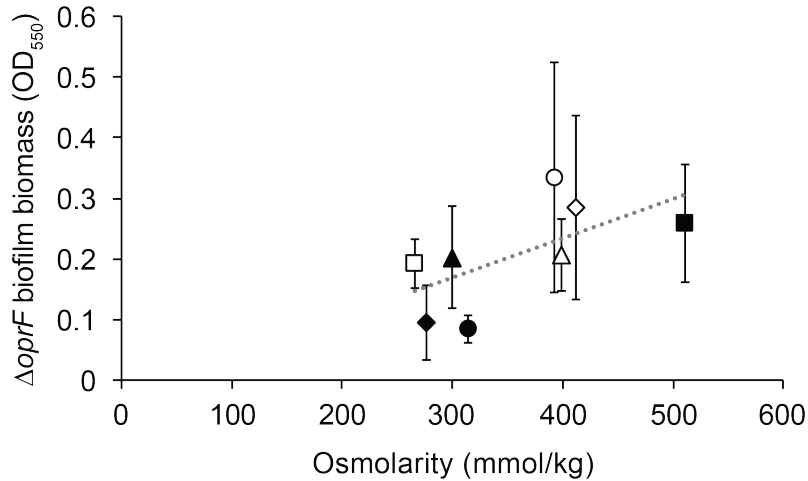

**Supplemental Figure S6. Weak correlation that is not statistically significant between osmolarity and  $\Delta oprF$  biofilm.**

Osmolarity of each base medium and its variants compared to  $\Delta oprF$  static microtiter biofilm biomass formed in respective medium. Osmolarity of original TSB base medium (black, circle), TSB 10 g/L NaCl variant (black, square), TSB with no glucose variant (black, triangle), TSB with no  $K_2HPO_4$  variant (black, diamond), LB base medium (white, circle), LB 5 g/L NaCl variant (white, square), LB with 2.5 g/L glucose variant (white, triangle), and LB with 2.5 g/L  $K_2HPO_4$  variant (white, diamond) were correlated to  $\Delta oprF$  biofilm biomass in each respective medium (gray dotted line,  $R^2 = 0.40541$ ;  $p > 0.05$ , Pearson's correlation).

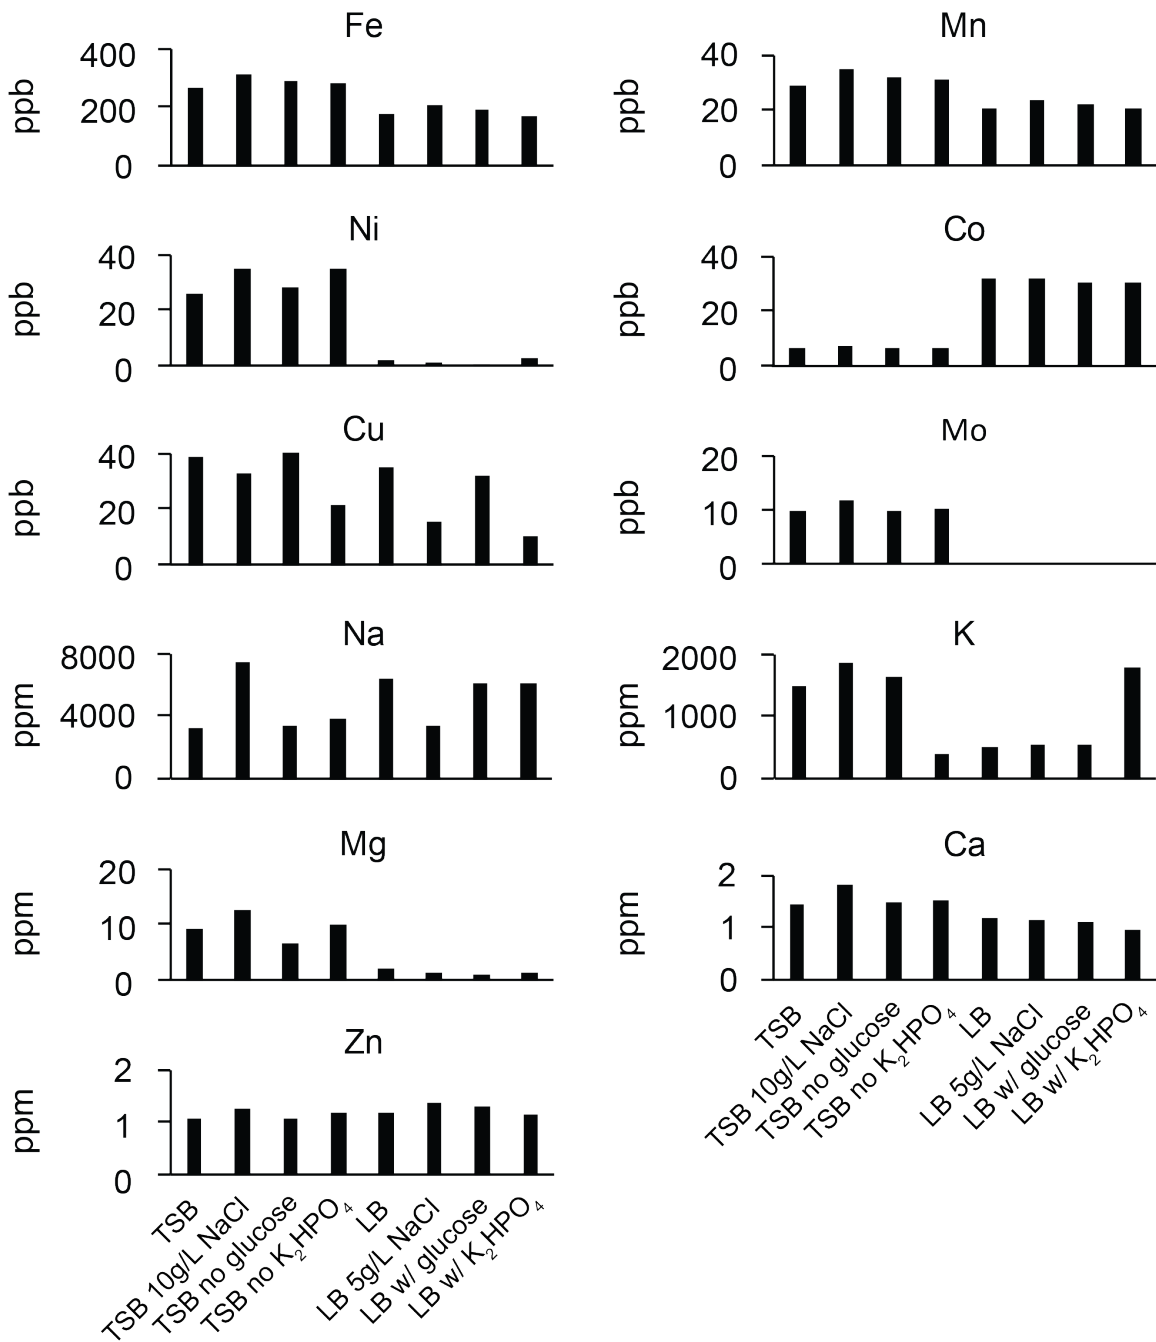

**Supplemental Figure S7. Metal concentrations in various media.**

Concentrations of biologically relevant metals (Fe, Mn, Ni, Co, Cu, Mo, Na, K, Mg, Ca, and Zn) in base media and variant formulations were determined by ICP-MS. Concentrations of each metal in parts per billion (ppb) or parts per million (ppm). No statistical significance between metal concentrations and  $\Delta oprF$  biofilm formation ( $p > 0.05$ , Pearson's correlation).

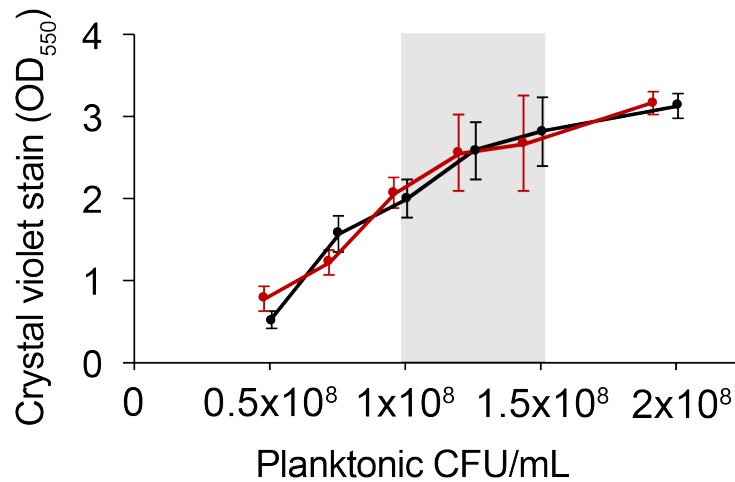

**Supplemental Figure S8. Planktonic PAO1 and  $\Delta oprF$  cells stain equivalently with crystal violet.**

PAO1 (WT, black) and  $\Delta oprF$  (red) cells grown in TSB at quantified cell densities (CFU/mL) and stained with 0.1% crystal violet exhibit equivalent absorbance. Gray box indicates the cell densities observed per well in biofilm cell viability assays in TSB. Error bars, SEM (N = 3).

## SUPPLEMENTAL REFERENCES

1. Vogel HJ, Bonner DM. 1956. Acetylornithinase of *Escherichia coli*: partial purification and some properties. *J Biol Chem* 218:97-106.
2. Tseng BS, Reichhardt C, Merrihew GE, Araujo-Hernandez SA, Harrison JJ, MacCoss MJ, Parsek MR. 2018. A Biofilm Matrix-Associated Protease Inhibitor Protects *Pseudomonas aeruginosa* from Proteolytic Attack. *MBio* 9.
3. Winsor GL, Griffiths EJ, Lo R, Dhillon BK, Shay JA, Brinkman FS. 2016. Enhanced annotations and features for comparing thousands of *Pseudomonas* genomes in the *Pseudomonas* genome database. *Nucleic Acids Res* 44:D646-53.
4. Hmelo LR, Borlee BR, Almlad H, Love ME, Randall TE, Tseng BS, Lin C, Irie Y, Storek KM, Yang JJ, Siehnel RJ, Howell PL, Singh PK, Tolker-Nielsen T, Parsek MR, Schweizer HP, Harrison JJ. 2015. Precision-engineering the *Pseudomonas aeruginosa* genome with two-step allelic exchange. *Nat Protoc* 10:1820-41.
5. Choi KH, Schweizer HP. 2006. mini-Tn7 insertion in bacteria with single attTn7 sites: example *Pseudomonas aeruginosa*. *Nat Protoc* 1:153-61.
6. Hoang TT, Kutchma AJ, Becher A, Schweizer HP. 2000. Integration-proficient plasmids for *Pseudomonas aeruginosa*: site-specific integration and use for engineering of reporter and expression strains. *Plasmid* 43:59-72.
7. Kristensen CS, Eberl L, Sanchez-Romero JM, Givskov M, Molin S, De Lorenzo V. 1995. Site-specific deletions of chromosomally located DNA segments with the multimer resolution system of broad-host-range plasmid RP4. *J Bacteriol* 177:52-8.
8. Holloway BW. 1955. Genetic recombination in *Pseudomonas aeruginosa*. *J Gen Microbiol* 13:572-81.
9. Wolfgang MC, Kulasekara BR, Liang X, Boyd D, Wu K, Yang Q, Miyada CG, Lory S. 2003. Conservation of genome content and virulence determinants among clinical and environmental isolates of *Pseudomonas aeruginosa*. *Proc Natl Acad Sci U S A* 100:8484-9.
10. Hancock RE, Carey AM. 1979. Outer membrane of *Pseudomonas aeruginosa*: heat- 2-mercaptoethanol-modifiable proteins. *J Bacteriol* 140:902-10.
11. Woodruff WA, Hancock RE. 1988. Construction and characterization of *Pseudomonas aeruginosa* protein F-deficient mutants after in vitro and in vivo insertion mutagenesis of the cloned gene. *J Bacteriol* 170:2592-8.
12. Zhao K, Tseng BS, Beckerman B, Jin F, Gibiansky ML, Harrison JJ, Luijten E, Parsek MR, Wong GCL. 2013. Psl trails guide exploration and microcolony formation in *Pseudomonas aeruginosa* biofilms. *Nature* 497:388-391.
13. Almlad H, Harrison JJ, Rybtke M, Groizeleau J, Givskov M, Parsek MR, Tolker-Nielsen T. 2015. The Cyclic AMP-Vfr Signaling Pathway in *Pseudomonas aeruginosa* Is Inhibited by Cyclic Di-GMP. *J Bacteriol* 197:2190-200.
14. Khakimova M, Ahlgren HG, Harrison JJ, English AM, Nguyen D. 2013. The stringent response controls catalases in *Pseudomonas aeruginosa* and is required for hydrogen peroxide and antibiotic tolerance. *J Bacteriol* 195:2011-20.
